# Supplementary material for: The Caenorhabditis elegans Ephrin EFN-4 Functions Non-cell Autonomously with Heparan Sulfate Proteoglycans to Promote Axon Outgrowth and Branching
Source: Oxford University Press journal article supplement (doi:10.1534/genetics.115.185298), 2015-12-07
Supplement: tables1.pdf [file tables1.pdf]

**Table S1** *efn-4* transgenic strain construction

| <b>Strain numbers</b> | <b>Transgenic array</b>                                                        | <b>Plasmids</b>                                                                                                                                |
|-----------------------|--------------------------------------------------------------------------------|------------------------------------------------------------------------------------------------------------------------------------------------|
| ATL20 – ATL22         | <i>kenEx4 – 6</i><br><i>[P-my0-3::efn-4 + P-my0-3::mCherry]</i>                | pLC681 (5ng.ml <sup>-1</sup> )<br>pPD131-68 (25ng.ml <sup>-1</sup> )<br>pBS II (20ng.ml <sup>-1</sup> )                                        |
| ATL25 – ATL27         | <i>kenEx9 – 11</i><br><i>[P-my0-2::efn-4 + P-my0-2::mCherry]</i>               | pMH853 (5ng.ml <sup>-1</sup> )<br>pBA183 (20ng.ml <sup>-1</sup> )<br>pBS II (25ng.ml <sup>-1</sup> )                                           |
| ATL28 – ATL30         | <i>kenEx12 – 14</i><br><i>[efn-4 genomic* + P-ttx-3-RFP]</i><br>* 5kb promoter | pCZ148 (5ng.ml <sup>-1</sup> )<br>pTTX-3-RFP (25ng.ml <sup>-1</sup> )<br>pBS II (20ng.ml <sup>-1</sup> )                                       |
| ATL35, ATL36          | <i>kenEx19, 20</i><br><i>[P-unc-119-efn-4 + P-ttx-3::RFP]</i>                  | pMH828 (5ng.ml <sup>-1</sup> )<br>pTTX-3-RFP (25ng.ml <sup>-1</sup> )<br>pBS II (20ng.ml <sup>-1</sup> )                                       |
| ATL50, ATL52          | <i>kenEx21, 23</i><br><i>[P-elt-3-efn-4 + sur-5::GFP + P-ttx-3-RFP]</i>        | pMH833 (5ng.ml <sup>-1</sup> )<br>pTTX-3-RFP (10ng.ml <sup>-1</sup> )<br>pTG96 (25ng.ml <sup>-1</sup> )<br>pBS II (10ng.ml <sup>-1</sup> )     |
| ATL63                 | <i>kenEx30</i><br><i>[P-elt-3-efn-4 + sur-5::GFP + P-ttx-3-RFP]</i>            | pMH833 (0.5ng.ml <sup>-1</sup> )<br>pTTX-3-RFP (10ng.ml <sup>-1</sup> )<br>pTG96 (20ng.ml <sup>-1</sup> )<br>pBS II (19.5ng.ml <sup>-1</sup> ) |
| CZ6954 – CZ6956       | <i>juEx1341 - 1343</i><br><i>[P-AIY-efn-4 + P-ttx-3-RFP]</i>                   | pMH340-3 (1ng.ml <sup>-1</sup> )<br>pTTX-3-RFP (25ng.ml <sup>-1</sup> )<br>pBS II (49ng.ml <sup>-1</sup> )                                     |
