# Supplementary material for: The Caenorhabditis elegans Ephrin EFN-4 Functions Non-cell Autonomously with Heparan Sulfate Proteoglycans to Promote Axon Outgrowth and Branching
Source: Oxford University Press journal article supplement (doi:10.1534/genetics.115.185298), 2015-12-07
Supplement: tables2.pdf [file tables2.pdf]

**Table S2 HSPG transgenic strain construction**

| <b>Strain</b>   | <b>Transgenic array</b>                                                         | <b>Plasmids</b>                                                                                            |
|-----------------|---------------------------------------------------------------------------------|------------------------------------------------------------------------------------------------------------|
| CZ6948 – CZ6950 | <i>juEx1335 - 1337</i><br><i>[P-ttx-3-GFP::<i>sdn-1</i> cDNA + P-ttx-3-RFP]</i> | pMH306-7 (1ng.ml <sup>-1</sup> )<br>pTTX-3-RFP (50ng.ml <sup>-1</sup> )<br>pBS II (49ng.ml <sup>-1</sup> ) |
| CZ6951 – CZ6953 | <i>juEx1338 - 1340</i><br><i>[P-gpn-1-GFP::<i>gpn-1</i> cDNA + P-ttx-3-RFP]</i> | pMH265 (1ng.ml <sup>-1</sup> )<br>pTTX-3-RFP (50ng.ml <sup>-1</sup> )<br>pBS II (49ng.ml <sup>-1</sup> )   |
| CZ7064 – CZ7066 | <i>juEx1358 - 1360</i><br><i>[P-ttx-3-gpn-1 cDNA + P-ttx-3-RFP]</i>             | pMH274 (5ng.ml <sup>-1</sup> )<br>pTTX-3-RFP (25ng.ml <sup>-1</sup> )<br>pBS II (20ng.ml <sup>-1</sup> )   |
| EVL491 – EVL493 | <i>lhEx174 - 176</i><br><i>[P-lon-2-lon-2 cDNA + P-ttx-3-RFP]</i>               | pHW474 (5ng.ml <sup>-1</sup> )<br>pTTX-3-RFP (25ng.ml <sup>-1</sup> )<br>pBS II (20ng.ml <sup>-1</sup> )   |
| ATL60 – ATL62   | <i>kenEx27 - 29</i><br><i>[P-elt-3-lon-2 cDNA + P-ttx-3-RFP]</i>                | pTG102 (5ng.ml <sup>-1</sup> )<br>pTTX-3-RFP (25ng.ml <sup>-1</sup> )<br>pBS II (20ng.ml <sup>-1</sup> )   |
| ATL32 – ATL34   | <i>kenEx16 – 18</i><br><i>[P-ttx-3-lon-2 + P-ttx-3-RFP]</i>                     | pMH644 (5ng.ml <sup>-1</sup> )<br>pTTX-3-RFP (25ng.ml <sup>-1</sup> )<br>pBS II (20ng.ml <sup>-1</sup> )   |
