# Supplementary material for: The Caenorhabditis elegans Ephrin EFN-4 Functions Non-cell Autonomously with Heparan Sulfate Proteoglycans to Promote Axon Outgrowth and Branching
Source: Oxford University Press journal article supplement (doi:10.1534/genetics.115.185298), 2015-12-07
Supplement: tables3.pdf [file tables3.pdf]

**Table S3. Temperature sensitivity of AIY primary neurite outgrowth defects (“short stop”)**

During the course of these studies, we observed that AIY primary neurite outgrowth was temperature sensitive. The table below illustrates the temperature sensitivity of *efn-4* axon outgrowth defects. The z-test was used to determine statistical significance between assay temperatures, i.e. *mgIs18 otIs76* assayed at 20°C was statistically compared to *mgIs18 otIs76* assayed at 25°C, etc. \*  $p < 0.05$ , \*\*  $p < 0.01$ , \*\*\*  $p < 0.001$ .

| Strain                                     | % Short stop         | Total animals scored |
|--------------------------------------------|----------------------|----------------------|
| wt background                              |                      |                      |
| <i>mgIs18 efn-4(bx80)</i> @15°C            | 23.1                 | 78                   |
| <i>mgIs18 efn-4(bx80)</i> @20°C            | 33.8                 | 77                   |
| <i>mgIs18 efn-4(bx80)</i> @25°C            | 32.0                 | 75                   |
| <i>mgIs18 efn-4(e1746ts)</i> @15°C         | 17.9                 | 78                   |
| <i>mgIs18 efn-4(e1746ts)</i> @ 20°C        | 21.3                 | 75                   |
| <i>mgIs18 efn-4(e1746ts)</i> @ 25°C        | 38.5 (* cf. 20°C)    | 78                   |
| <i>kal-1(gf)</i> background                |                      |                      |
| <i>mgIs18 otIs76</i> @15°C                 | 0.0                  | 76                   |
| <i>mgIs18 otIs76</i> @20°C                 | 1.3                  | 77                   |
| <i>mgIs18 otIs76</i> @25°C                 | 9.1 (* cf. 20°C)     | 77                   |
| <i>mgIs18 otIs76 efn-4(bx80)</i> (@ 15°C)  | 35.1                 | 77                   |
| <i>mgIs18 otIs76 efn-4(bx80)</i> (@ 20°C)  | 26.0                 | 77                   |
| <i>mgIs18 otIs76 efn-4(bx80)</i> (@ 25°C)  | 40.5                 | 79                   |
| <i>mgIs18 otIs76 efn-4(e1746ts)</i> @15°C  | 29.5                 | 78                   |
| <i>mgIs18 otIs76 efn-4(e1746ts)</i> @ 20°C | 19.8                 | 81                   |
| <i>mgIs18 otIs76 efn-4(e1746ts)</i> @ 25°C | 45.3 (***) cf. 20°C) | 75                   |
| <i>mgIs18 otIs76 efn-4(e36)</i> (@15°C)    | 47.4                 | 78                   |
| <i>mgIs18 otIs76 efn-4(e36)</i> (@20°C)    | 19.0 (***) cf. 15°C) | 79                   |
| <i>mgIs18 otIs76 efn-4(e36)</i> (@25°C)    | 32.5                 | 77                   |
