# Supplementary material for: The Caenorhabditis elegans Ephrin EFN-4 Functions Non-cell Autonomously with Heparan Sulfate Proteoglycans to Promote Axon Outgrowth and Branching
Source: Oxford University Press journal article supplement (doi:10.1534/genetics.115.185298), 2015-12-07
Supplement: tables4.pdf [file tables4.pdf]

**Table S4. Temperature sensitivity of *kal-1(gf)* AIY neuron ectopic axon branching**

During the course of these studies, we also observed that the penetrance of *kal-1(gf)* ectopic axon branching was temperature sensitive. The table below shows three repeats of our axon branching assay run at 15, 20, and 25°C. The z-test was used to determine statistical significance between assay temperatures, i.e. *mgls18 otls76* assayed at 20°C was statistically compared to *mgls18 otls76* assayed at 25°C, etc. \*  $p < 0.05$ , \*\*  $p < 0.01$ , \*\*\*  $p < 0.001$ .

| Strain                                                 | % Branched AIYs | Significance | Total neurons scored |
|--------------------------------------------------------|-----------------|--------------|----------------------|
| <i>mgls18 otls76 @15°C – repeat 1</i>                  | 25.3            |              | 158                  |
| <i>mgls18 otls76 @20°C – repeat 1</i>                  | 42.8            | **           | 154                  |
| <i>mgls18 otls76 @25°C – repeat 1</i>                  | 59.8            | **           | 152                  |
| <i>mgls18 otls76 @15°C – repeat 2</i>                  | 32.2            |              | 152                  |
| <i>mgls18 otls76 @20°C – repeat 2</i>                  | 57.1            | ***          | 154                  |
| <i>mgls18 otls76 @25°C – repeat 2</i>                  | 68.1            | *            | 154                  |
| <i>mgls18 otls76 (out-crossed 2x) @20°C – repeat 3</i> | 54.6            | **           | 152                  |
| <i>mgls18 otls76 (out-crossed 2x) @25°C – repeat 3</i> | 69.7            |              | 152                  |
| <i>mgls18 otls76 efn-4(bx80) @ 15°C</i>                | 30.5            |              | 154                  |
| <i>mgls18 otls76 efn-4(bx80) @ 20°C</i>                | 36.4            | ns           | 154                  |
| <i>mgls18 otls76 efn-4(bx80) @ 25°C</i>                | 39.2            | ns           | 158                  |
| <i>mgls18 otls76 efn-4(e1746ts) @15°C</i>              | 15.4            |              | 156                  |
| <i>mgls18 otls76 efn-4(e1746ts) @ 20°C</i>             | 35.8            | ***          | 162                  |
| <i>mgls18 otls76 efn-4(e1746ts) @ 25°C</i>             | 35.3            | ns           | 150                  |
| <i>mgls18 otls76 efn-4(e36) @15°C</i>                  | 21.2            |              | 156                  |
| <i>mgls18 otls76 efn-4(e36) @20°C</i>                  | 36.1            | **           | 158                  |
| <i>mgls18 otls76 efn-4(e36) @25°C</i>                  | 38.7            | ns           | 168                  |
